# Supplementary material for: ABA-dependent control of GIGANTEA signalling enables drought escape via up-regulation of FLOWERING LOCUS T in Arabidopsis thaliana
Source: PubMed Central journal article supplement (PMC5181575; doi:10.1093/jxb/erw384), 2016-10-12
Supplement: supp_erw384_Supplementary_figures_S1_S2_tables_S1_S4.pdf [file supp_erw384_Supplementary_figures_S1_S2_tables_S1_S4.pdf]

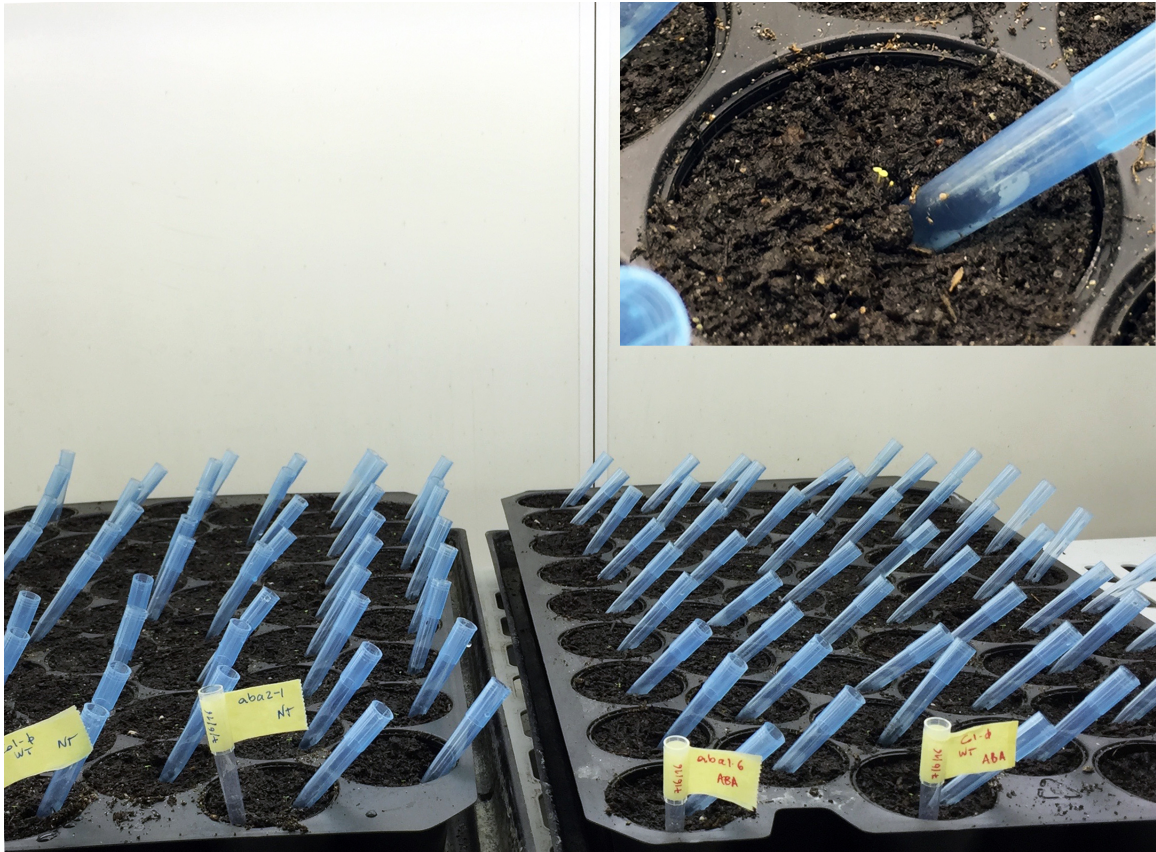

**Figure S1**

Method used for exogenous application of ABA. The ABA or mock solutions are applied in soil using a pipette tip as a funnel. Treatments started early in development (3 days post germination), thus before the floral transition.

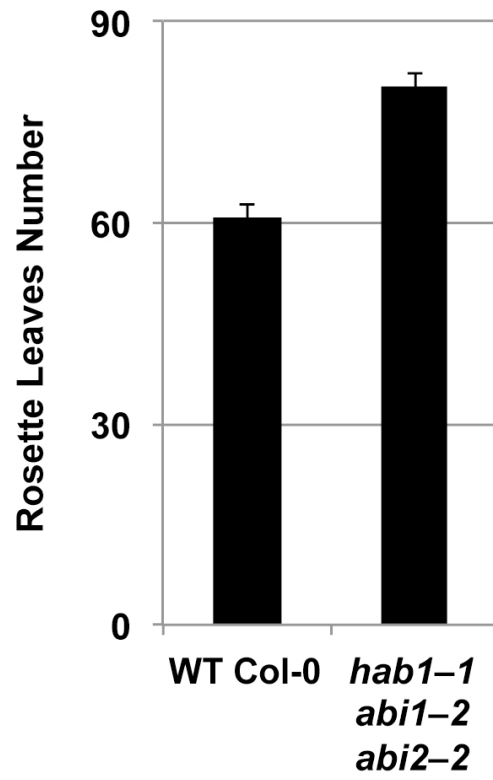

**Figure S2**

Activated ABA signaling inhibits flowering under SDs. Rosette leaves mean number at flowering of wild type (Col-0) and mutant *hab1-1 abi1-2 abi2-2* grown under SDs. Student's t test P value  $\leq 0.001$  (\*\*\*) compared to Wild Type.

Supplemental Table S1

| Fig<br>1 | A | Genotype                                   | MOCK            |           |       | ABA 25µM       |     |       | t-test MOCK vs<br>ABA 25µM |
|----------|---|--------------------------------------------|-----------------|-----------|-------|----------------|-----|-------|----------------------------|
|          |   |                                            | Rosette leaves  | SE        | range | Rosette leaves | SE  | range |                            |
|          |   | WT Col-0                                   | 10.3            | 0.3       | 9-12  | 8.6            | 0.6 | 5-10  | P< 0.001                   |
|          |   | <i>aba1-6</i>                              | 17.8            | 0.7       | 16-22 | 11.9           | 0.9 | 8-17  | P< 0.001                   |
|          |   | <i>aba2-1</i>                              | 16.9            | 0.7       | 13-21 | 8.8            | 0.5 | 7-13  | P< 0.001                   |
|          |   | One-Way ANOVA with post-HOC Tukey HSD Test |                 |           |       |                |     |       |                            |
|          |   | MOCK Genotype pair                         | p-value         | inference |       |                |     |       |                            |
|          |   | WT Col vs <i>aba1-6</i>                    | 1.01E-03        | ** p<0.01 |       |                |     |       |                            |
|          |   | WT Col vs <i>aba2-1</i>                    | 1.01E-03        | ** p<0.01 |       |                |     |       |                            |
|          |   | <i>aba1-6</i> vs <i>aba2-1</i>             | 2.77E-01        | NS        |       |                |     |       |                            |
|          |   | Normal Watering                            |                 |           |       |                |     |       |                            |
|          | B | Genotype                                   | Rosette leaves  | SE        | range | t-test         |     |       |                            |
|          |   | WT Col-0                                   | 13.9            | 0.5       | 12-16 |                |     |       |                            |
|          |   | <i>aba1-6</i>                              | 17.1            | 0.3       | 16-18 | P<0.001        |     |       |                            |
|          |   | <i>ft-10</i>                               | 40.9            | 1.4       | 36-48 |                |     |       |                            |
|          |   | <i>ft-10 aba1-6</i>                        | 53.3            | 1.3       | 40-63 | P<0.001        |     |       |                            |
|          |   | <i>ft-10 tsf-1</i>                         | 53.9            | 0.6       | 51-55 |                |     |       |                            |
|          |   | <i>ft-10 tsf-1 aba1-6</i>                  | 58.4            | 1.4       | 53-64 | P=0.018        |     |       |                            |
|          |   | <i>gi-2</i>                                | 61.9            | 1.0       | 59-67 |                |     |       |                            |
|          |   | <i>gi-2 aba1-6</i>                         | 62.0            | 1.2       | 54-73 | P=0.945        |     |       |                            |
|          |   | Normal Watering                            |                 |           |       |                |     |       |                            |
|          | C | Genotype                                   | Rosette leaves  | SE        | range | t-test         |     |       |                            |
|          |   | WT Col-0                                   | 6.5             | 0.2       | 5-8   |                |     |       |                            |
|          |   | <i>aba1-6</i>                              | 7.8             | 0.2       | 7-9   | P<0.001        |     |       |                            |
|          |   | <i>ft-10</i>                               | 20.8            | 0.5       | 19-23 |                |     |       |                            |
|          |   | <i>ft-10 aba1-6</i>                        | 24.9            | 0.5       | 24-28 | P<0.001        |     |       |                            |
|          |   | <i>co-10</i>                               | 36.0            | 0.7       | 31-40 |                |     |       |                            |
|          |   | <i>co-10 aba1-6</i>                        | 36.5            | 1.0       | 28-43 | P=0.484        |     |       |                            |
| Fig<br>3 | A | Genotype                                   | Normal Watering |           |       | Low Watering   |     |       | t-test NW vs LW            |
|          |   |                                            | Rosette leaves  | SE        | range | Rosette leaves | SE  | range |                            |
|          |   | WT Col-0                                   | 15.9            | 0.4       | 14-18 | 11.7           | 0.5 | 9-15  | P<0.001                    |
|          |   | <i>cdf1-R cdf2-1 cdf3-1 cdf5-1</i>         | 7.8             | 0.2       | 6-9   | 5.8            | 0.1 | 5-7   | P<0.001                    |
|          |   | <i>cdf1-R cdf2-1 cdf3-1 cdf5-1 gi-100</i>  | 9.2             | 0.2       | 8-11  | 8.9            | 0.2 | 8-10  | P=0.311                    |
|          |   | Normal Watering                            |                 |           |       |                |     |       |                            |
|          | B | Genotype                                   | Rosette leaves  | SE        | range | Low Watering   |     |       | t-test NW vs LW            |
|          |   |                                            | Rosette leaves  | SE        | range | Rosette leaves | SE  | range |                            |
|          |   | WT Col-0                                   | 55.7            | 0.9       | 51-62 | 63.4           | 2.4 | 55-75 | P=0.003                    |
|          |   | <i>co-10</i>                               | 57.5            | 1.3       | 51-65 | 73.2           | 2.8 | 54-85 | P<0.001                    |
|          |   | <i>cdf1-R cdf2-1 cdf3-1 cdf5-1</i>         | 10.5            | 0.4       | 8-14  | 10.2           | 0.8 | 7-15  | P=0.729                    |
|          |   | Normal Watering                            |                 |           |       |                |     |       |                            |
|          | G | Genotype                                   | Rosette leaves  | SE        | range | t-test         |     |       |                            |
|          |   | WT Col-0                                   | 14.0            | 0.0       | 14    |                |     |       |                            |
|          |   | <i>aba1-6</i>                              | 22.7            | 4.0       | 16-27 | P<0.001        |     |       |                            |
|          |   | <i>elf3-1</i>                              | 4.1             | 0.4       | 4-5   |                |     |       |                            |
|          |   | <i>elf3-1 aba1-6</i>                       | 6.5             | 1.6       | 4-9   | P<0.001        |     |       |                            |

**Fig 4**

| A                                          | Genotype                       | Normal Watering |                     |       | Low Watering   |     |       | t-test NW vs LW   |
|--------------------------------------------|--------------------------------|-----------------|---------------------|-------|----------------|-----|-------|-------------------|
|                                            |                                | Rosette leaves  | SE                  | range | Rosette leaves | SE  | range |                   |
|                                            | <b>WT Ler</b>                  | <b>8.2</b>      | 0.2                 | 7-9   | <b>6.9</b>     | 0.1 | 6-8   | <b>P&lt;0.001</b> |
|                                            | <i>aba1-1</i>                  | <b>9.4</b>      | 0.3                 | 8-11  | <b>9.0</b>     | 0.3 | 8-10  | <b>P=0.365</b>    |
|                                            | <i>aba1-3</i>                  | <b>9.3</b>      | 0.2                 | 8-11  | <b>9.3</b>     | 0.2 | 8-10  | <b>P=0.446</b>    |
|                                            | <i>abi1-1</i>                  | <b>8.5</b>      | 0.3                 | 7-9   | <b>9.5</b>     | 0.3 | 8-10  | <b>P&lt;0.001</b> |
| One-Way ANOVA with post-HOC Tukey HSD Test |                                |                 |                     |       |                |     |       |                   |
|                                            | Normal Watering Genotype pair  | p-value         | inference           |       |                |     |       |                   |
|                                            | <b>WT Ler vs <i>aba1-1</i></b> | 1.01E-03        | <b>** p&lt;0.01</b> |       |                |     |       |                   |
|                                            | <b>WT Ler vs <i>aba1-3</i></b> | 3.98E-03        | <b>** p&lt;0.01</b> |       |                |     |       |                   |
|                                            | <b>WT Ler vs <i>abi1-1</i></b> | 8.56E-01        | NS                  |       |                |     |       |                   |
|                                            | <i>aba1-1</i> vs <i>aba1-3</i> | 9.00E-01        | NS                  |       |                |     |       |                   |
|                                            | <i>aba1-1</i> vs <i>abi1-1</i> | 5.83E-02        | NS                  |       |                |     |       |                   |
|                                            | <i>aba1-3</i> vs <i>abi1-1</i> | 1.30E-01        | NS                  |       |                |     |       |                   |
| <b>B</b>                                   | Genotype                       | Normal Watering |                     |       |                |     |       |                   |
|                                            |                                | Rosette leaves  | SE                  | range |                |     |       |                   |
|                                            | <b>WT Ler</b>                  | <b>37.9</b>     | 0.7                 | 33-41 |                |     |       |                   |
|                                            | <i>aba1-3</i>                  | <b>37.0</b>     | 1.2                 | 27-42 |                |     |       |                   |
|                                            | <i>abi1-1</i>                  | <b>27.0</b>     | 1.0                 | 20-32 |                |     |       |                   |
| One-Way ANOVA with post-HOC Tukey HSD Test |                                |                 |                     |       |                |     |       |                   |
|                                            | Normal Watering Genotype pair  | p-value         | inference           |       |                |     |       |                   |
|                                            | <b>WT Ler vs <i>aba1-3</i></b> | 7.76E-01        | NS                  |       |                |     |       |                   |
|                                            | <b>WT Ler vs <i>abi1-1</i></b> | 1.01E-03        | <b>** p&lt;0.01</b> |       |                |     |       |                   |
|                                            | <i>aba1-3</i> vs <i>abi1-1</i> | 1.01E-03        | <b>** p&lt;0.01</b> |       |                |     |       |                   |

**Fig 5**

| F                                          | Genotype                                  | Normal Watering |                     |       | Low Watering   |     |       | t-test NW vs LW   |
|--------------------------------------------|-------------------------------------------|-----------------|---------------------|-------|----------------|-----|-------|-------------------|
|                                            |                                           | Rosette leaves  | SE                  | range | Rosette leaves | SE  | range |                   |
|                                            | <b>WT Ler</b>                             | <b>35.9</b>     | 0.5                 | 32-38 | <b>38.4</b>    | 0.8 | 35-44 | <b>P=0.016</b>    |
|                                            | <i>abi1-1</i>                             | <b>27.6</b>     | 0.8                 | 23-32 | <b>31.9</b>    | 1.3 | 21-36 | <b>P=0.019</b>    |
|                                            | <b>35S::<i>GI</i></b>                     | <b>13.6</b>     | 0.3                 | 12-16 | <b>11.8</b>    | 0.2 | 11-13 | <b>P&lt;0.001</b> |
|                                            | <b>35S::<i>GI abi1-1</i></b>              | <b>12.6</b>     | 0.5                 | 10-17 | <b>17.5</b>    | 0.5 | 15-20 | <b>P&lt;0.001</b> |
| One-Way ANOVA with post-HOC Tukey HSD Test |                                           |                 |                     |       |                |     |       |                   |
|                                            | Normal Watering Genotype pair             | p-value         | inference           |       |                |     |       |                   |
|                                            | <b>WT Ler vs <i>abi1-1</i></b>            | 1.01E-03        | <b>** p&lt;0.01</b> |       |                |     |       |                   |
|                                            | <b>WT Ler vs 35S::<i>GI</i></b>           | 1.01E-03        | <b>** p&lt;0.01</b> |       |                |     |       |                   |
|                                            | <b>WT Ler vs 35S::<i>GI abi1-1</i></b>    | 1.01E-03        | <b>** p&lt;0.01</b> |       |                |     |       |                   |
|                                            | <i>abi1-1</i> vs 35S:: <i>GI</i>          | 1.01E-03        | <b>** p&lt;0.01</b> |       |                |     |       |                   |
|                                            | <i>abi1-1</i> vs 35S:: <i>GI abi1-1</i>   | 1.01E-03        | <b>** p&lt;0.01</b> |       |                |     |       |                   |
|                                            | 35S:: <i>GI</i> vs 35S:: <i>GI abi1-1</i> | 5.07E-01        | NS                  |       |                |     |       |                   |

**Fig 6**

| C                                          | Genotype                              | Normal Watering |                     |       |  |  |  |  |
|--------------------------------------------|---------------------------------------|-----------------|---------------------|-------|--|--|--|--|
|                                            |                                       | Rosette leaves  | SE                  | range |  |  |  |  |
|                                            | <b>WT Ler</b>                         | <b>28.9</b>     | 1.4                 | 25-37 |  |  |  |  |
|                                            | <i>abi1-1</i>                         | <b>17.0</b>     | 0.4                 | 16-19 |  |  |  |  |
|                                            | <i>soc1-1</i>                         | <b>50.3</b>     | 1.9                 | 42-59 |  |  |  |  |
|                                            | <i>abi1-1 soc1-1</i>                  | <b>53.7</b>     | 1.3                 | 39-61 |  |  |  |  |
| One-Way ANOVA with post-HOC Tukey HSD Test |                                       |                 |                     |       |  |  |  |  |
|                                            | Genotype pair                         | p-value         | inference           |       |  |  |  |  |
|                                            | <b>WT Ler vs <i>abi1-1</i></b>        | 1.01E-03        | <b>** p&lt;0.01</b> |       |  |  |  |  |
|                                            | <b>WT Ler vs <i>soc1-1</i></b>        | 1.01E-03        | <b>** p&lt;0.01</b> |       |  |  |  |  |
|                                            | <b>WT Ler vs <i>abi1-1 soc1-1</i></b> | 1.01E-03        | <b>** p&lt;0.01</b> |       |  |  |  |  |
|                                            | <i>abi1-1</i> vs <i>soc1-1</i>        | 1.01E-03        | <b>** p&lt;0.01</b> |       |  |  |  |  |
|                                            | <i>abi1-1</i> vs <i>abi1-1 soc1-1</i> | 1.01E-03        | <b>** p&lt;0.01</b> |       |  |  |  |  |
|                                            | <i>soc1-1</i> vs <i>abi1-1 soc1-1</i> | 3.25E-01        | NS                  |       |  |  |  |  |

| 6                                          | D | Genotype                              | Normal Watering |             |       |
|--------------------------------------------|---|---------------------------------------|-----------------|-------------|-------|
|                                            |   |                                       | Rosette leaves  | SE          | range |
|                                            |   | WT Ler                                | 8.3             | 0.2         | 8-9   |
|                                            |   | <i>abi1-1</i>                         | 8.4             | 0.2         | 8-9   |
|                                            |   | <i>soc1-1</i>                         | 12.5            | 0.2         | 12-13 |
|                                            |   | <i>abi1-1 soc1-1</i>                  | 15.0            | 0.2         | 14-16 |
| One-Way ANOVA with post-HOC Tukey HSD Test |   |                                       |                 |             |       |
|                                            |   | Genotype pair                         | p-value         | inference   |       |
|                                            |   | WT Ler vs <i>abi1-1</i>               | 7.96E-01        | NS          |       |
|                                            |   | WT Ler vs <i>soc1-1</i>               | 5.69E-06        | *** p<0.001 |       |
|                                            |   | WT Ler vs <i>abi1-1 soc1-1</i>        | 6.88E-15        | *** p<0.001 |       |
|                                            |   | <i>abi1-1</i> vs <i>soc1-1</i>        | 7.08E-05        | *** p<0.001 |       |
|                                            |   | <i>abi1-1</i> vs <i>abi1-1 soc1-1</i> | 2.80E-14        | *** p<0.001 |       |
|                                            |   | <i>soc1-1</i> vs <i>abi1-1 soc1-1</i> | 3.62E-10        | *** p<0.001 |       |

| Fig<br>Supp 2 | Genotype                    | Normal Watering |     |        | t-test  |
|---------------|-----------------------------|-----------------|-----|--------|---------|
|               |                             | Rosette leaves  | SE  | range  |         |
|               | WT Col-0                    | 60.6            | 2.1 | 49-80  |         |
|               | <i>hab1-1 abi1-2 abi2-2</i> | 80.4            | 1.9 | 68-101 | P<0.001 |

Flowering time of mutant and transgenic plants used in this study. Mean values of vegetative leaves and standard error (SE) of plants under different watering conditions. Two tailed Student's *t* test values (*P*) and One-Way ANOVA (*P*) are shown, NS (Not Significant).

## Supplemental Table S2

| Fig<br>3 | H | GI expression Genotype pair           | Tukey HSD |           |
|----------|---|---------------------------------------|-----------|-----------|
|          |   |                                       | p-value   | inference |
|          |   | WT Col-0 vs <i>aba1-6</i>             | 9.00E-01  | NS        |
|          |   | WT Col-0 vs <i>elf3-1</i>             | 1.01E-03  | ** p<0.01 |
|          |   | WT Col-0 vs <i>elf3-1 aba1-6</i>      | 1.01E-03  | ** p<0.01 |
|          |   | <i>aba1-6</i> vs <i>elf3-1</i>        | 1.01E-03  | ** p<0.01 |
|          |   | <i>aba1-6</i> vs <i>elf3-1 aba1-6</i> | 1.01E-03  | ** p<0.01 |
|          |   | <i>elf3-1</i> vs <i>elf3-1 aba1-6</i> | 9.00E-01  | NS        |
|          |   |                                       |           |           |
|          |   |                                       |           |           |
|          | I | CO expression Genotype pair           | Tukey HSD |           |
|          |   | WT Col-0 vs <i>aba1-6</i>             | 1.29E-01  | NS        |
|          |   | WT Col-0 vs <i>elf3-1</i>             | 8.99E-01  | NS        |
|          |   | WT Col-0 vs <i>elf3-1 aba1-6</i>      | 8.96E-01  | NS        |
|          |   | <i>aba1-6</i> vs <i>elf3-1</i>        | 3.57E-02  | * p<0.05  |
|          |   | <i>aba1-6</i> vs <i>elf3-1 aba1-6</i> | 3.76E-01  | NS        |
|          |   | <i>elf3-1</i> vs <i>elf3-1 aba1-6</i> | 5.19E-01  | NS        |
|          |   |                                       |           |           |
|          |   |                                       |           |           |
|          | J | FT expression Genotype pair           | Tukey HSD |           |
|          |   | WT Col-0 vs <i>aba1-6</i>             | 9.00E-01  | NS        |
|          |   | WT Col-0 vs <i>elf3-1</i>             | 1.46E-02  | * p<0.05  |
|          |   | WT Col-0 vs <i>elf3-1 aba1-6</i>      | 9.00E-01  | NS        |
|          |   | <i>aba1-6</i> vs <i>elf3-1</i>        | 6.89E-03  | ** p<0.01 |
|          |   | <i>aba1-6</i> vs <i>elf3-1 aba1-6</i> | 9.00E-01  | NS        |
|          |   | <i>elf3-1</i> vs <i>elf3-1 aba1-6</i> | 1.08E-02  | * p<0.05  |
|          |   |                                       |           |           |
|          |   |                                       |           |           |
|          | K | TSF expression Genotype pair          | Tukey HSD |           |
|          |   | WT Col-0 vs <i>aba1-6</i>             | 7.44E-02  | NS        |
|          |   | WT Col-0 vs <i>elf3-1</i>             | 4.35E-01  | NS        |
|          |   | WT Col-0 vs <i>elf3-1 aba1-6</i>      | 1.49E-01  | NS        |
|          |   | <i>aba1-6</i> vs <i>elf3-1</i>        | 3.44E-03  | ** p<0.01 |
|          |   | <i>aba1-6</i> vs <i>elf3-1 aba1-6</i> | 9.00E-01  | NS        |
|          |   | <i>elf3-1</i> vs <i>elf3-1 aba1-6</i> | 7.37E-03  | ** p<0.01 |

One-Way ANOVA (*P*) for the expression analysis of Fig 3H-K are shown, NS (Not Significant).

### Supplemental Table S3

| Allele                                    | Reference                        | Background |
|-------------------------------------------|----------------------------------|------------|
| <i>aba1-6</i>                             | (Niyogi et al., 1998)            | Col-0      |
| <i>aba2-1</i>                             | (Léon-Kloosterziel et al., 1996) | Col-0      |
| <i>ft-10</i>                              | (Yoo et al., 2005)               | Col-0      |
| <i>ft-10 aba1-6</i>                       | This Work                        | Col-0      |
| <i>ft-10 tsf-1</i>                        | (Jang et al., 2009)              | Col-0      |
| <i>ft-10 tsf-1 aba-6</i>                  | This Work                        | Col-0      |
| <i>gi-2</i>                               | (Fowler et al., 1999)            | Col-1      |
| <i>gi-2 aba1-6</i>                        | This Work                        | Col-1      |
| <i>co-10</i>                              | (Laubinger et al., 2006)         | Col-0      |
| <i>co-10 aba1-6</i>                       | This Work                        | Col-0      |
| <i>elf3-1</i>                             | (Zagotta et al., 1992)           | Col-0      |
| <i>elf3-1 aba1-6</i>                      | This Work                        | Col-0      |
| <i>cdf1-R cdf2-1 cdf3-1 cdf5-1</i>        | (Fornara et al., 2009)           | Col-0      |
| <i>gi-100 cdf1-R cdf2-1 cdf3-1 cdf5-1</i> | (Fornara et al., 2009)           | Col-0      |
| <i>aba1-1</i>                             | (Koornneef et al. 1982)          | Ler        |
| <i>aba1-3</i>                             | (Koornneef et al. 1982)          | Ler        |
| <i>abil-1</i>                             | (Koornneef et al., 1984)         | Ler        |
| <i>soc1-1</i>                             | (Onouchi et al., 2000)           | Ler        |
| <i>abil-1 soc1-1</i>                      | This Work                        | Ler        |
| <i>35S::GI</i>                            | (Mizoguchi et al., 2005)         | Ler        |
| <i>abil-1 35S::GI</i>                     | This Work                        | Ler        |
| <i>hab1-1 abil-2 pp2ca-1</i>              | (Rubio et al., 2009)             | Col-0      |
| <i>hab1-1 abil-2 abi2-2</i>               | (Rubio et al., 2009)             | Col-0      |

Genotypes used in this study

**Fornara F, Panigrahi KCS, Gissot L, Sauerbrunn N, RUhl M, Jarillo JA, Coupland G** (2009) Arabidopsis DOF Transcription Factors Act Redundantly to Reduce CONSTANS Expression and Are Essential for a Photoperiodic Flowering Response. *Dev Cell* **17**: 75–86

**Fowler S, Lee K, Onouchi H, Samach A, Richardson K, Morris B, Coupland G, Putterill J** (1999) GIGANTEA: a circadian clock-controlled gene that regulates photoperiodic flowering in Arabidopsis and encodes a protein with several possible membrane-spanning domains. *EMBO J* **18**: 4679–4688

**Jang S, Torti S, Coupland G** (2009) Genetic and spatial interactions between FT, TSF and SVP during the early stages of floral induction in Arabidopsis. *The Plant Journal* **60**: 614–625

**Koornneef M, Jorna ML, Brinkhorst-van der Swan DLC, Karssen CM** The isolation of abscisic acid (ABA) deficient mutants by selection of induced revertants in non-germinating gibberellin sensitive lines of Arabidopsis thaliana (L.) heynh. *Theoretical and Applied Genetics* **61**: 385–393

**Koornneef M, Reuling G, Karssen CM** (1984) The isolation and characterization of abscisic acid-insensitive mutants of Arabidopsis thaliana. *Physiol Plant* **61**: 377–383

- Laubinger S, Marchal V, Gentilhomme J, Wenkel S, Adrian J, Jang S, Kulajta C, Braun H, Coupland G, Hoecker U** (2006) Arabidopsis SPA proteins regulate photoperiodic flowering and interact with the floral inducer CONSTANS to regulate its stability. *Development* **133**: 3213–3222
- Léon-Kloosterziel KM, Gil MA, Ruijs GJ, Jacobsen SE, Olszewski NE, Schwartz SH, Zeevaart JAD, Koornneef M** (1996) Isolation and characterization of abscisic acid-deficient Arabidopsis mutants at two new loci. *The Plant Journal* **10**: 655–661
- Mizoguchi T, Wright L, Fujiwara S, Cremer F, Lee K, Onouchi H, Mouradov A, Fowler S, Kamada H, Putterill J, et al** (2005) Distinct roles of GIGANTEA in promoting flowering and regulating circadian rhythms in Arabidopsis. *Plant Cell* **17**: 2255–2270
- Niyogi KK, Grossman AR, Björkman O** (1998) Arabidopsis mutants define a central role for the xanthophyll cycle in the regulation of photosynthetic energy conversion. *Plant Cell* **10**: 1121–1134
- Onouchi H, Igeno M, Perilleux C, Graves K, Coupland G** (2000) Mutagenesis of plants overexpressing CONSTANS demonstrates novel interactions among Arabidopsis flowering-time genes. *Plant Cell* **12**: 885–900
- Rubio S, Rodrigues A, Saez A, Dizon MB, Galle A, Kim T-H, Santiago J, Flexas J, Schroeder JI, Rodriguez PL** (2009) Triple loss of function of protein phosphatases type 2C leads to partial constitutive response to endogenous abscisic acid. *Plant Physiol* **150**: 1345–1355
- Yoo SK, Chung KS, Kim J, Lee JH, Hong SM, Yoo SJ, Yoo SY, Lee JS, Ahn JH** (2005) CONSTANS activates SUPPRESSOR OF OVEREXPRESSION OF CONSTANS 1 through FLOWERING LOCUS T to promote flowering in Arabidopsis. *Plant Physiol* **139**: 770–778
- Zagotta MT, Shannon S, Jacobs C, Meeks-Wagner DR** (1992) Early-Flowering Mutants of Arabidopsis thaliana. *Australian Journal of Plant Physiology* **19**: 411–418



## Supplemental Table S4

| Gene             | Forward                                                                                             | Use        |
|------------------|-----------------------------------------------------------------------------------------------------|------------|
| <i>aba1-6</i>    | GCTCGGAGTAAAGGCGGCGA<br>CAGGAAGTCCCCGTGACGCC                                                        | Genotyping |
| <i>abil-1</i>    | ATGGAGGAAGTATCTCCGGCG<br>TCAGTTCAAGGGTTTGCTCTTGAG                                                   | Genotyping |
| <i>CO WT</i>     | atgttgaacaagagagtaac<br>tcattgtgtactgtatcatctg                                                      | Genotyping |
| <i>co-10</i>     | atgttgaacaagagagtaac<br>gcctttcagaatggataaatgccttgcttcc                                             | Genotyping |
| <i>atb pAB11</i> | GGGGACAAGTTTGTACAAAAAAGCAGGCTCTCTTATCCACTTGCCCCG<br>GGGGACCACTTGTACAAGAAAGCTGGGTGCGATCGCCGGAGATACTC | Cloning    |
| <i>ACT</i>       | CTCTCCCGCTATGTATGTCGCCA<br>GTGAGACACACCATCACCAG                                                     | qPCR       |
| <i>CO</i>        | CTACAACGACAATGGTTCCATTAAC<br>CAGGGTCAGGTTGTTGC                                                      | qPCR       |
| <i>FT</i>        | CTAGCAACCCTCACCTCCGAGAATA<br>CTGCCAAGCTGTCGAAACAATATAA                                              | qPCR       |
| <i>TSF</i>       | CTCGGGAATTCATCGTATTG<br>CCCTCTGGCAGTTGAAGTAA                                                        | qPCR       |
| <i>SOC1</i>      | ATCGAGGAGCTGCAACAGAT<br>GCTACTCTCTTCATCACCTCTCC                                                     | qPCR       |
| <i>GI</i>        | AATTCAGCACGCGCCTATTG<br>GTTGCTTCTGCTGCAGGAACTT                                                      | qPCR       |

Primers used in this study
